# Supplementary material for: Augmentation of FTIR spectral datasets using Wasserstein generative adversarial networks for cancer liquid biopsies
Source: Royal Society of Chemistry journal article supplement (doi:10.1039/d3an00669g), 2023-01-01
Supplement: d3an00669g1.pdf [file d3an00669g1.pdf]

# Supporting Information for "Augmentation of FTIR Spectral Datasets Using Wasserstein Generative Adversarial Networks For Cancer Liquid Biopsies"

Rose G. McHardy,<sup>a,b</sup> Georgios Antoniou,<sup>b</sup> Justin J. A. Conn,<sup>b</sup> Matthew J. Baker,<sup>b,c</sup> and David S. Palmer,<sup>\*a,b</sup>

<sup>a</sup> Department of Pure and Applied Chemistry, Thomas Graham Building, 295 Cathedral Street, University of Strathclyde, Glasgow, G1 1XL, UK

<sup>b</sup> Dxcover Ltd, Royal College Building, 204 George Street, Glasgow, G1 1XW, UK

<sup>c</sup> School of Medicine, Faculty of Clinical and Biomedical Sciences, University of Central Lancashire, Preston, PR1 2HE, UK

Table S1: Distribution of full pancreatic cancer dataset

| Full PC            |         | C       | NC       | Total    |
|--------------------|---------|---------|----------|----------|
| Age, years         | Mean    | 65      | 57       | 59       |
|                    | Min-max | 39-87   | 20-90    | 20-90    |
| Sex, n(%)          | Female  | 69 (42) | 260 (57) | 329 (53) |
|                    | Male    | 97 (58) | 199 (43) | 296 (47) |
| Cancer stage, n(%) | I       | 6 (4)   | -        | 6 (1)    |
|                    | II      | 64 (39) | -        | 64 (10)  |
|                    | III     | 69 (42) | -        | 69 (11)  |
|                    | IV      | 19 (11) | -        | 19 (3)   |
|                    | Unknown | 8 (5)   | -        | 8 (1)    |

Table S2: Distribution of 525 patient pancreatic cancer dataset

| 525 PC             |         | C       | NC       | Total    |
|--------------------|---------|---------|----------|----------|
| Age, years         | Mean    | 65      | 57       | 59       |
|                    | Min-max | 39-87   | 20-90    | 20-90    |
| Sex, n(%)          | Female  | 44 (38) | 230 (56) | 274 (52) |
|                    | Male    | 72 (62) | 179 (44) | 251 (48) |
| Cancer stage, n(%) | I       | 4 (3)   | -        | 4 (1)    |
|                    | II      | 44 (38) | -        | 44 (8)   |
|                    | III     | 47 (41) | -        | 47 (9)   |
|                    | IV      | 13 (11) | -        | 13 (2)   |
|                    | Unknown | 8 (7)   | -        | 8 (2)    |

Table S3: Distribution of full colorectal cancer dataset

| Full PC            |         | C        | NC       | Total    |
|--------------------|---------|----------|----------|----------|
| Age, years         | Mean    | 66       | 57       | 60       |
|                    | Min-max | 29-85    | 20-90    | 20-90    |
| Sex, n(%)          | Female  | 64 (32)  | 260 (57) | 324 (49) |
|                    | Male    | 136 (68) | 199 (43) | 335 (51) |
| Cancer stage, n(%) | I       | 36 (18)  | -        | 36 (5)   |
|                    | II      | 70 (35)  | -        | 70 (11)  |
|                    | III     | 67 (34)  | -        | 67 (10)  |
|                    | IV      | 27 (14)  | -        | 27 (4)   |

Table S4: Distribution of 559 patient colorectal cancer dataset

| 559 Colorectal     |         | C        | NC       | Total    |
|--------------------|---------|----------|----------|----------|
| Age, years         | Mean    | 66       | 57       | 59       |
|                    | Min-max | 29-85    | 20-90    | 20-90    |
| Sex, n(%)          | Female  | 48 (32)  | 234 (57) | 282 (50) |
|                    | Male    | 103 (68) | 174 (43) | 277 (50) |
| Cancer stage, n(%) | I       | 27 (18)  | -        | 27 (5)   |
|                    | II      | 52 (34)  | -        | 52 (9)   |
|                    | III     | 51 (34)  | -        | 51 (9)   |
|                    | IV      | 21 (14)  | -        | 21 (4)   |

Table S5: Distribution of 100 patient colorectal dataset

| 100 Colorectal     |         | C       | NC      | Total   |
|--------------------|---------|---------|---------|---------|
| Age, years         | Mean    | 67      | 58      | 62      |
|                    | Min-max | 37-84   | 20-80   | 20-84   |
| Sex, n(%)          | Female  | 16 (32) | 25 (50) | 41 (41) |
|                    | Male    | 34 (68) | 25 (50) | 59 (59) |
| Cancer stage, n(%) | I       | 9 (18)  | -       | 9 (9)   |
|                    | II      | 18 (36) | -       | 18 (18) |
|                    | III     | 17 (34) | -       | 17 (17) |
|                    | IV      | 6 (12)  | -       | 6 (6)   |

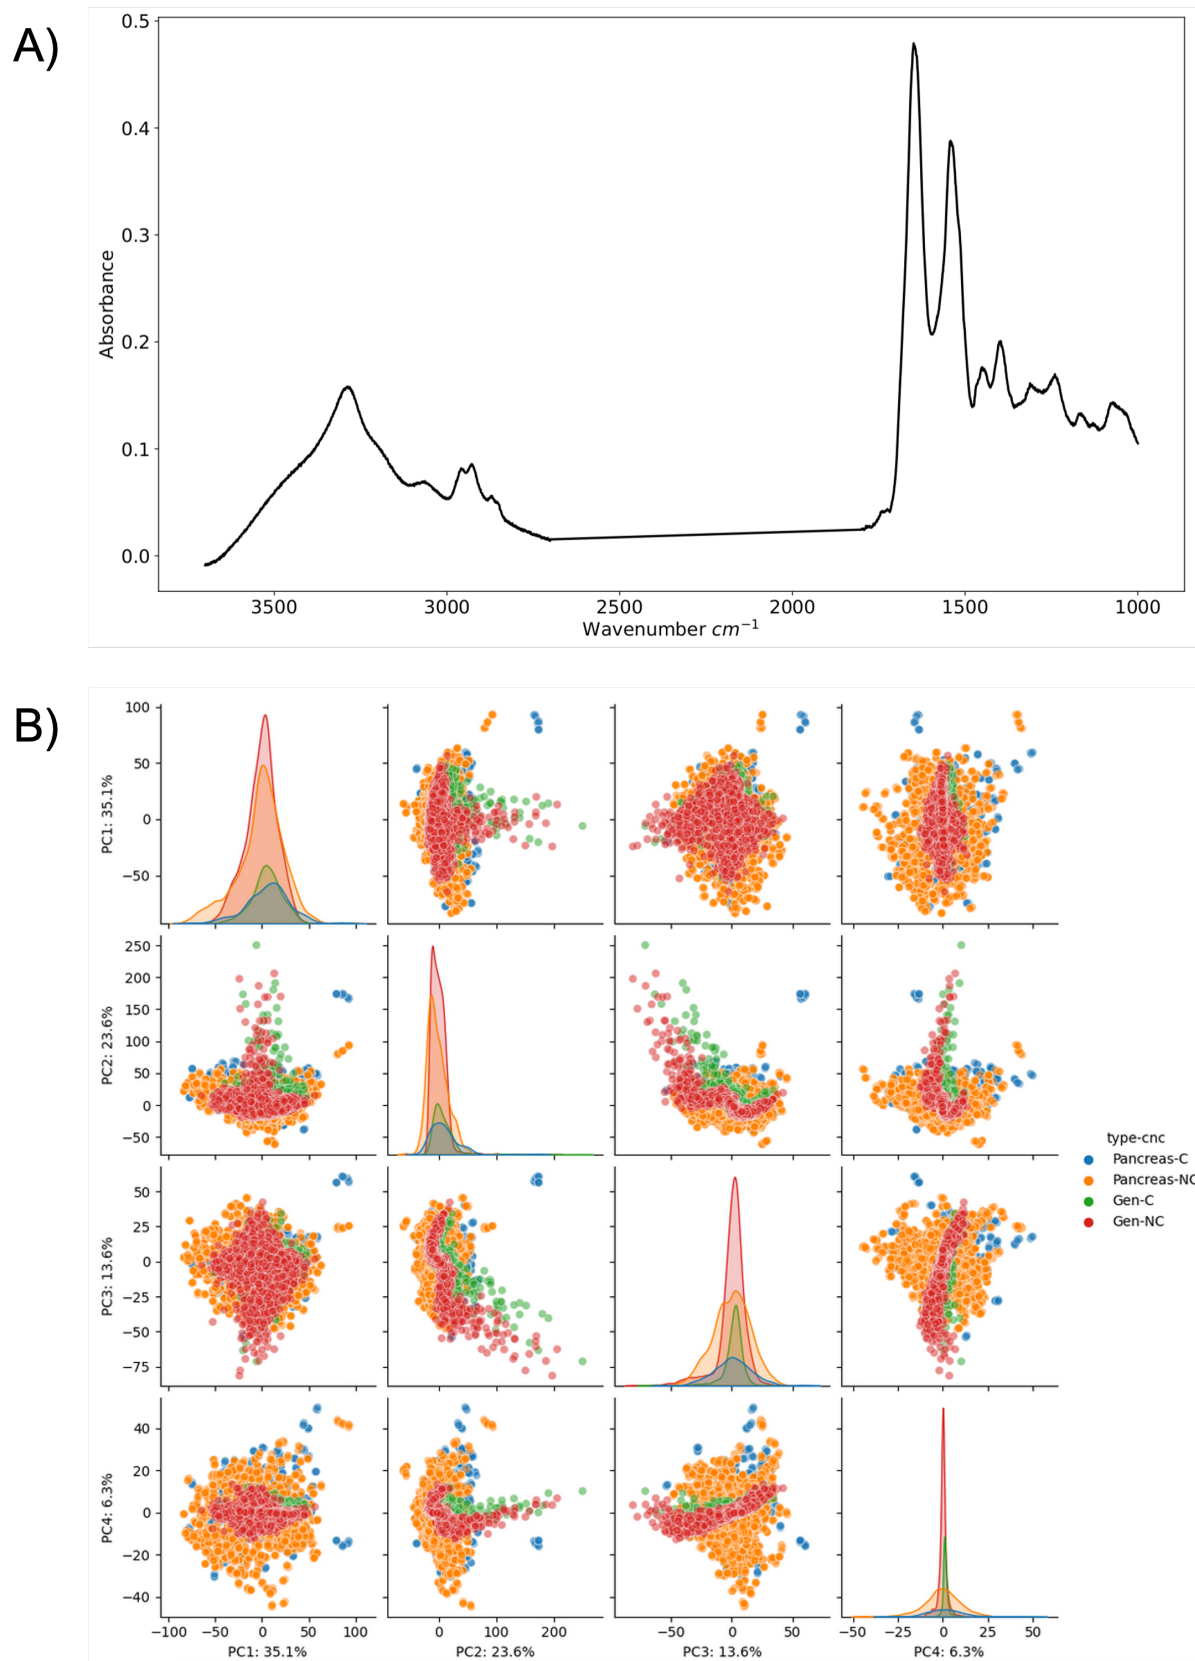

Figure S1: Output from WGAN with 3 generator layers and 1 critic layers with 512 units in the dense layer: A) example of generated spectra from WGAN, B) generated spectra projected onto real spectra PCA space.

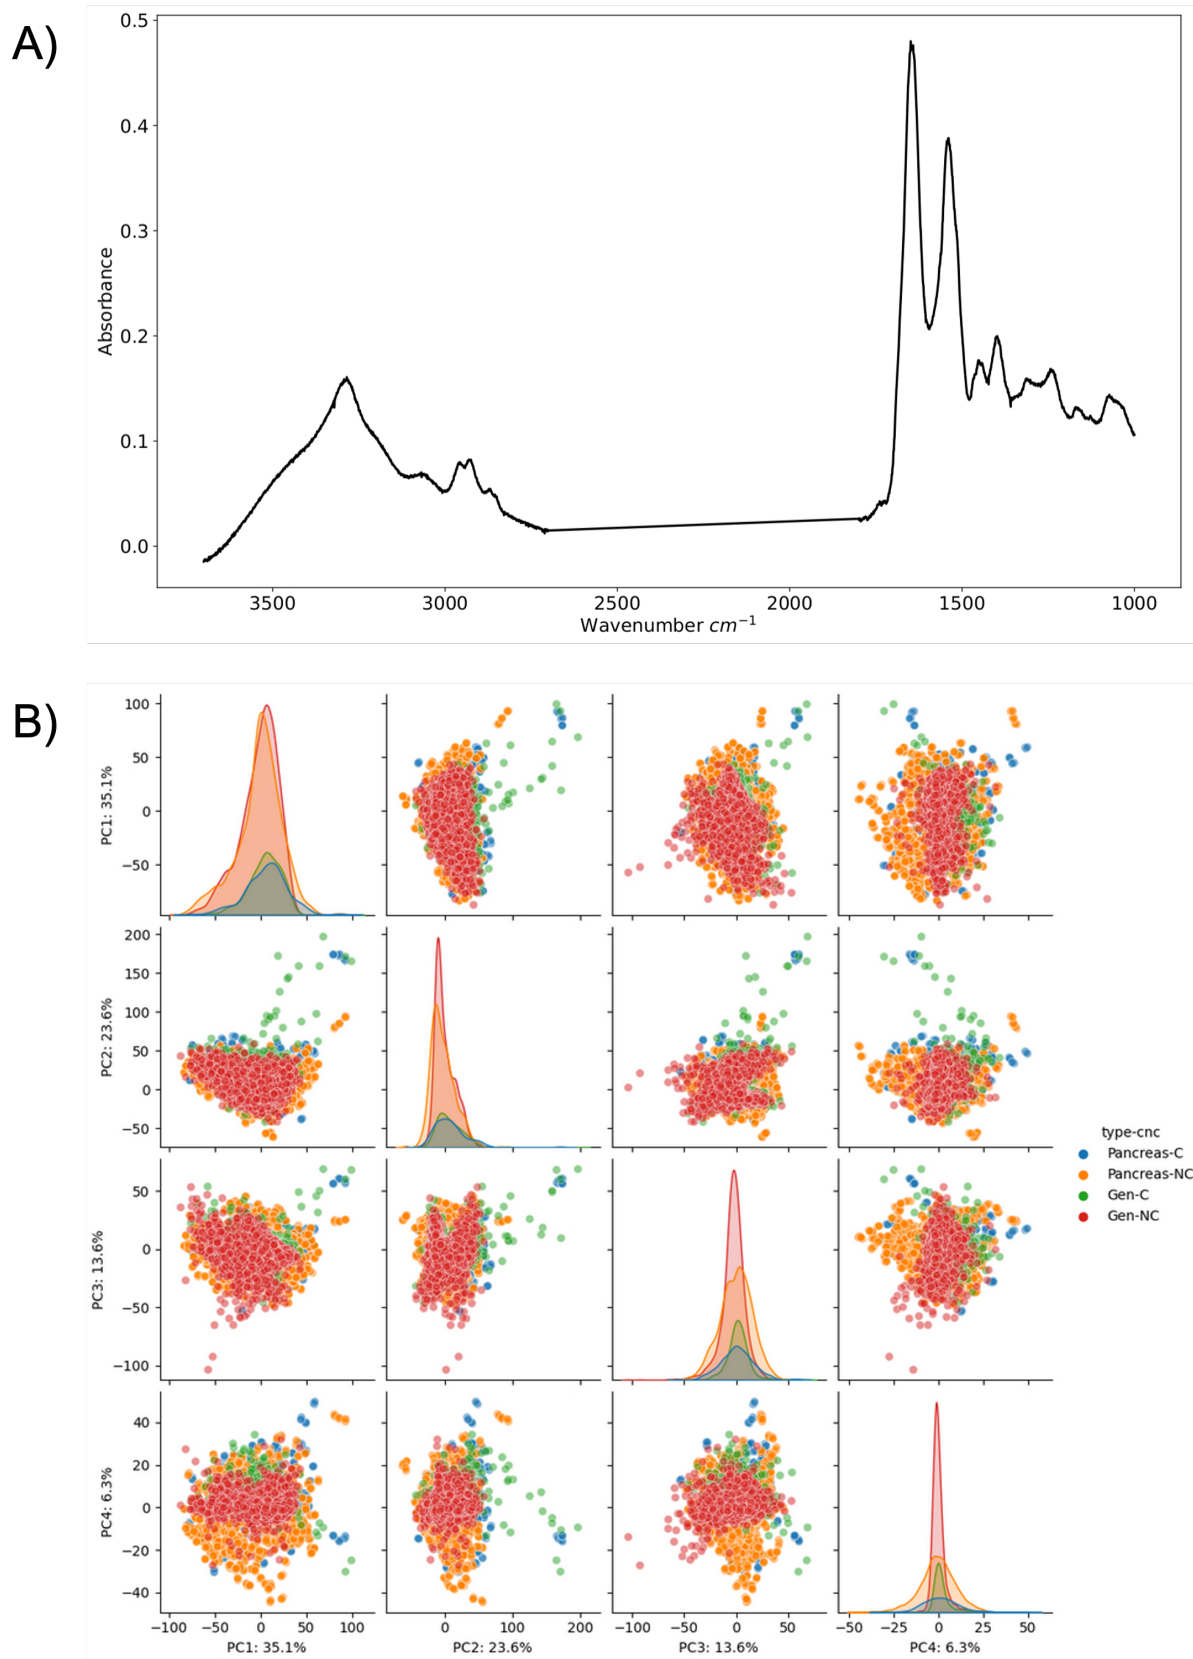

Figure S2: Output from WGAN with 3 generator layers and 2 critic layers with 1024 and 512 units in the dense layers: A) example of generated spectra from WGAN, B) generated spectra projected onto real spectra PCA space.



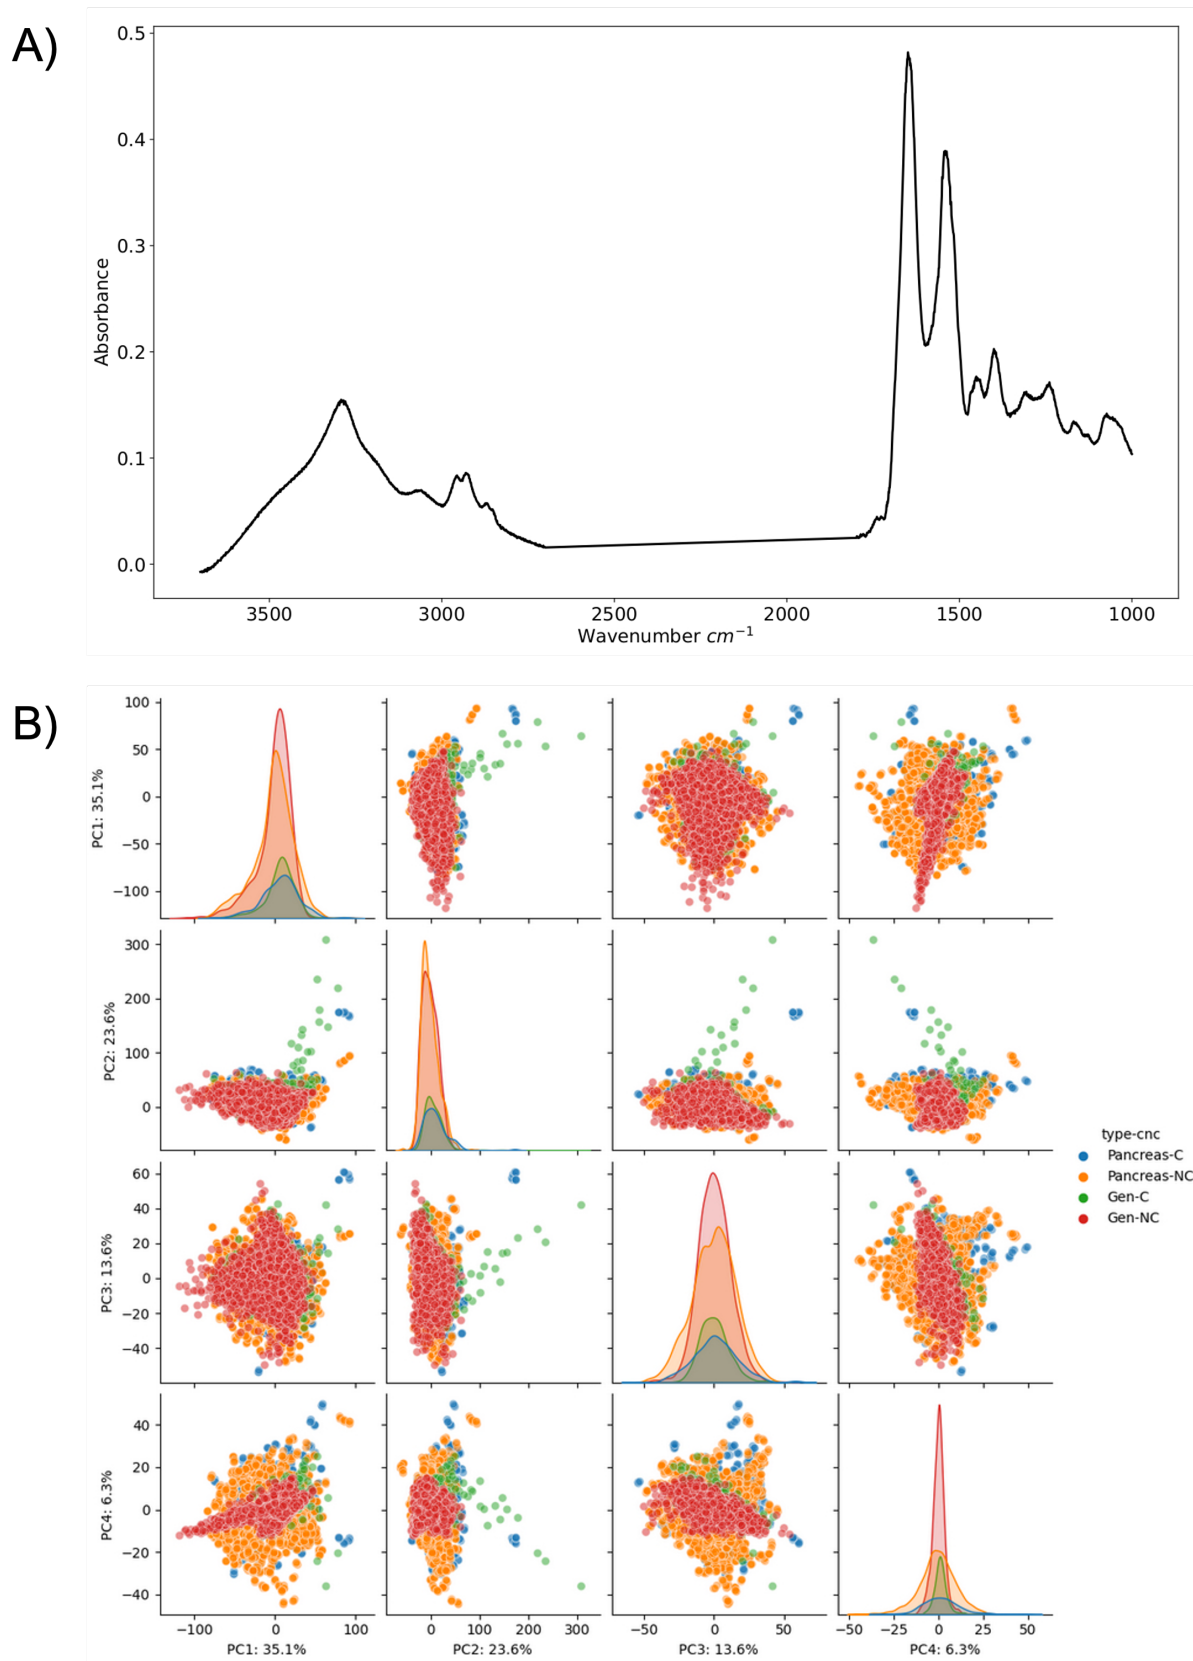

Figure S3: Output from WGAN with 3 generator layers and 2 critic layers with 512 and 256 units in the dense layers: A) example of generated spectra from WGAN, B) generated spectra projected onto real spectra PCA space.

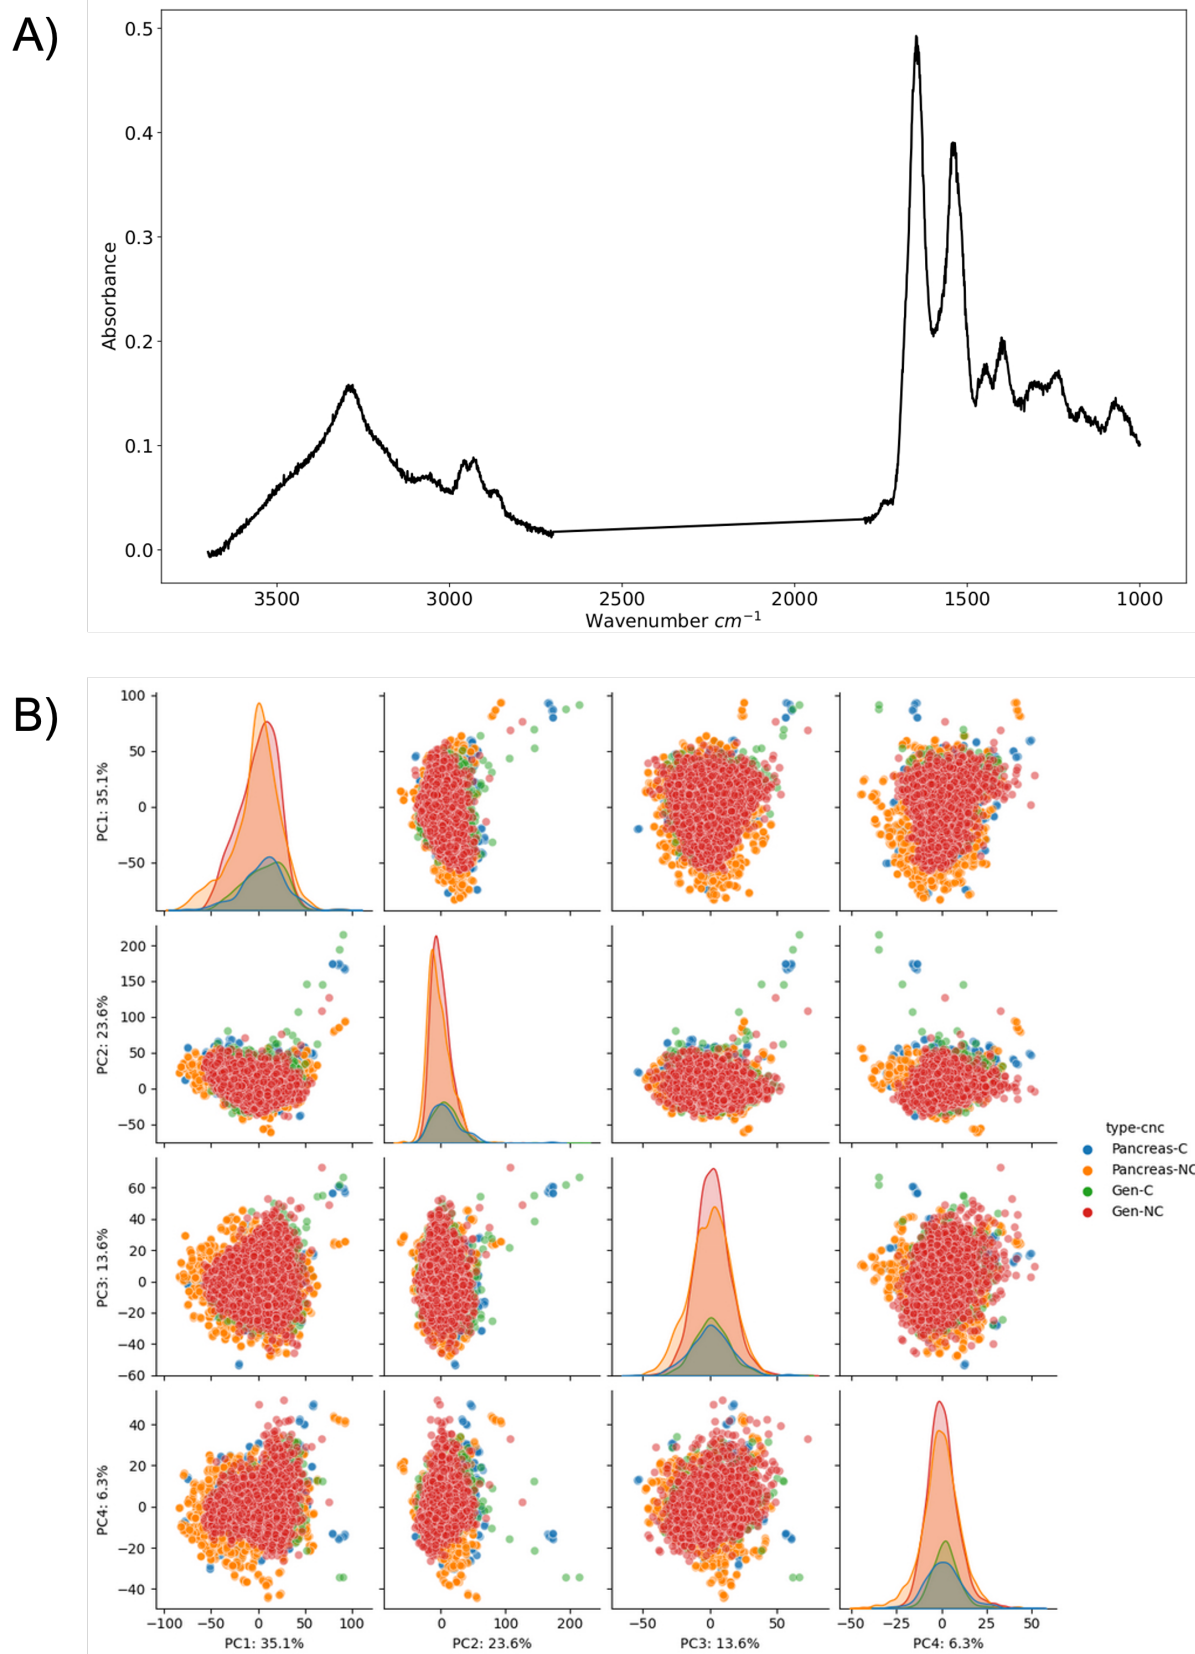

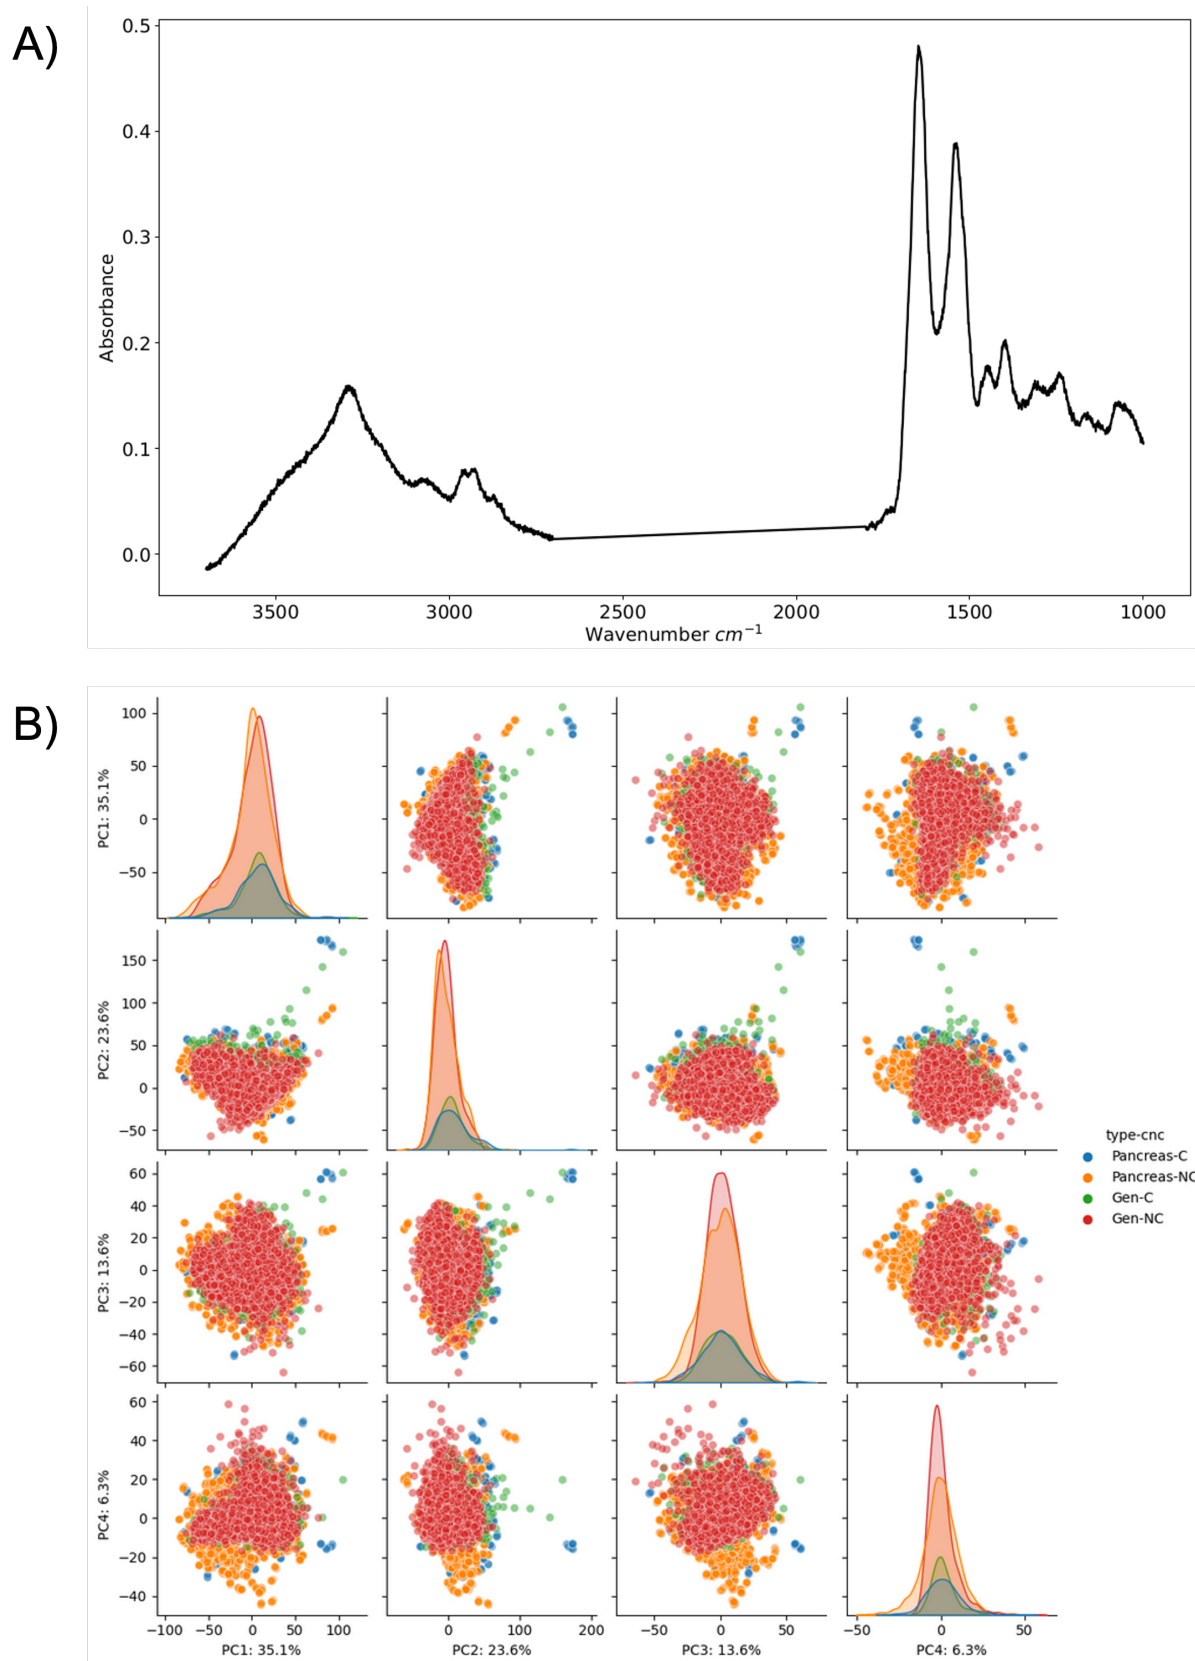

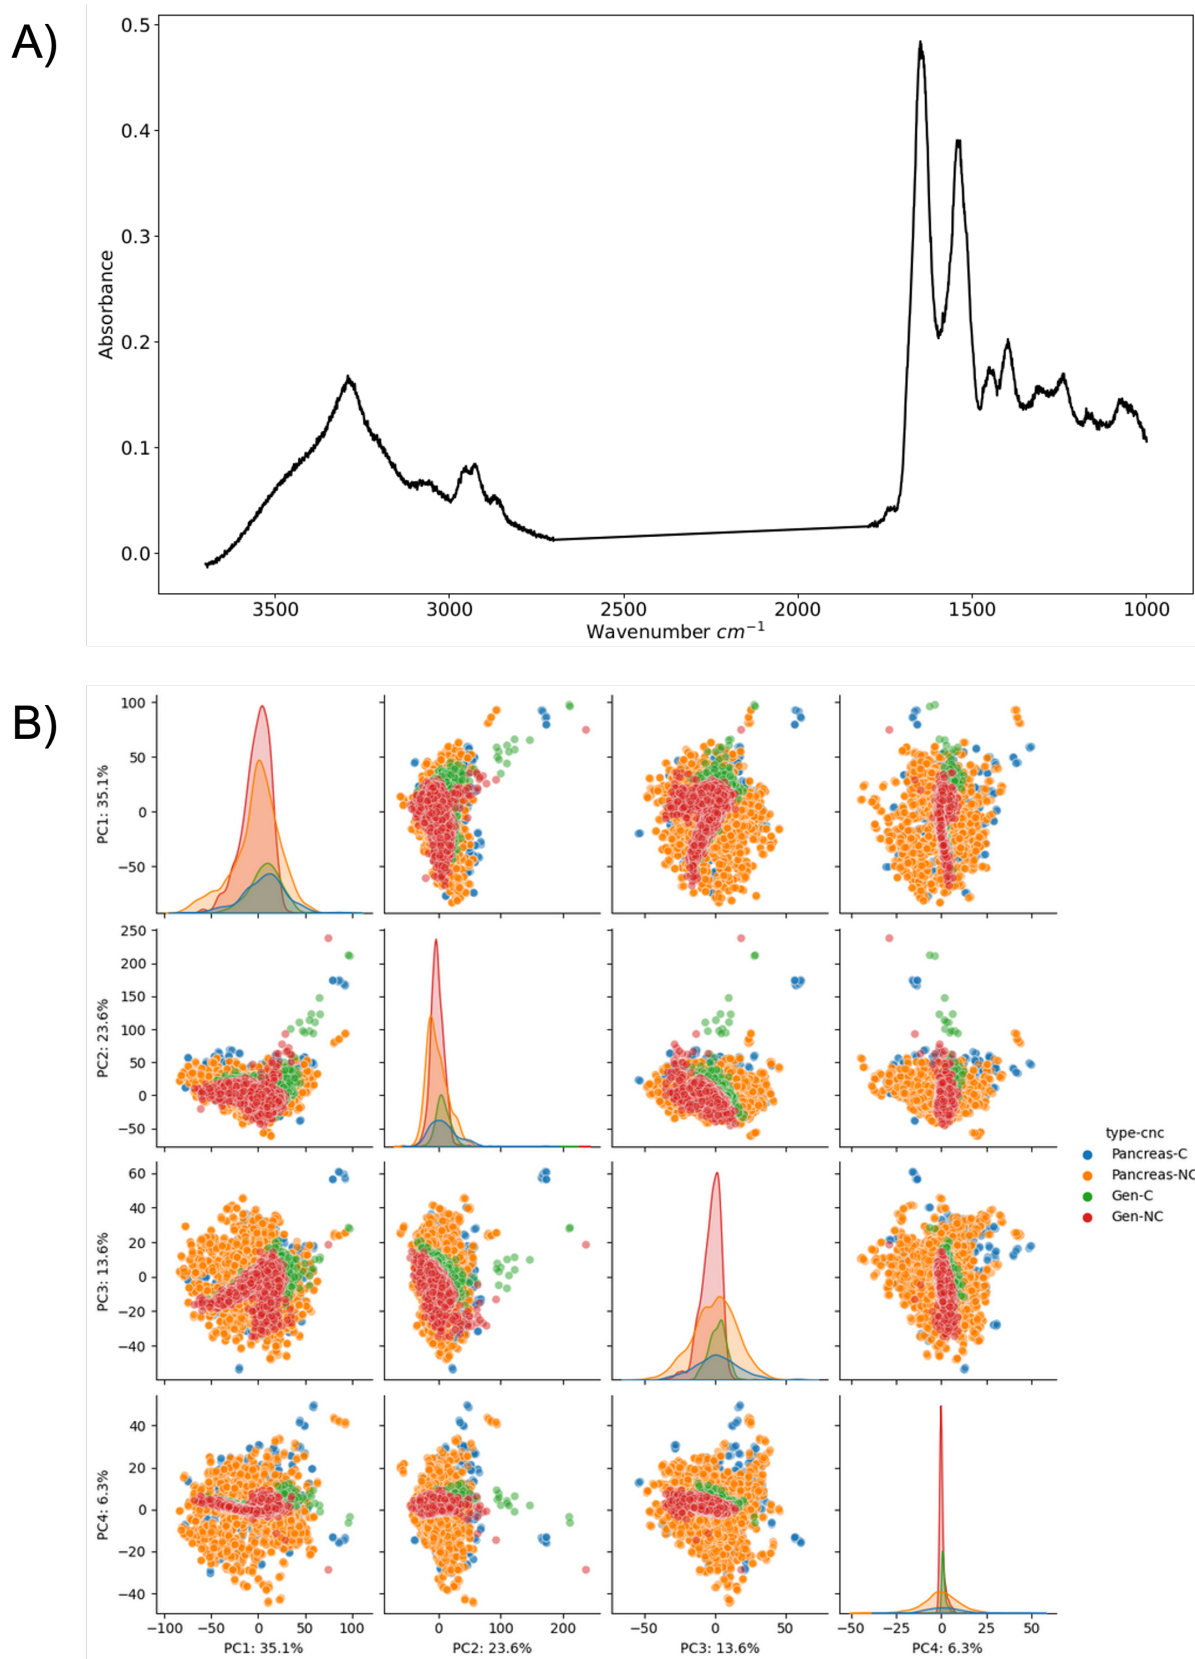

Figure S6: Output from WGAN with 3 generator layers and 3 critic layers with 512, 256, and 128 units in the dense layers: A) example of generated spectra from WGAN, B) generated spectra projected onto real spectra PCA space.

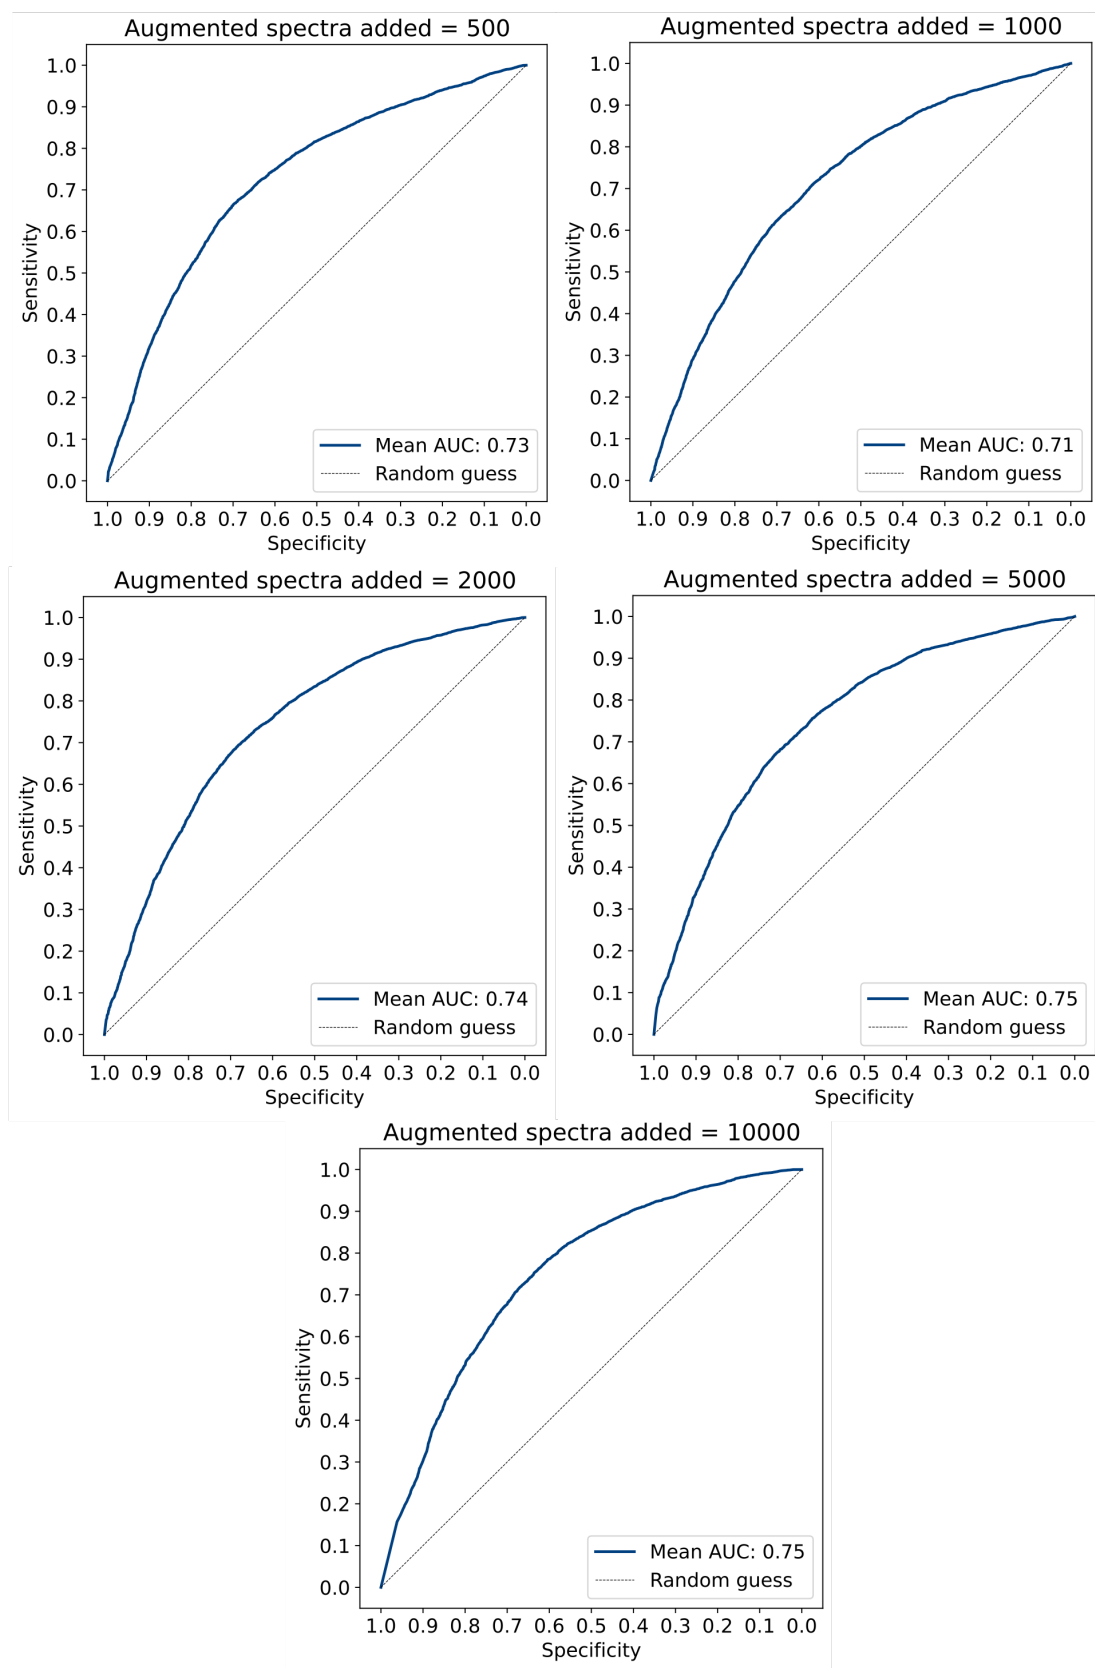

Figure S7: ROC curves for CNN models trained on augmented spectra generated by adding noise to spectra with the validation set containing 100-patient dataset only.

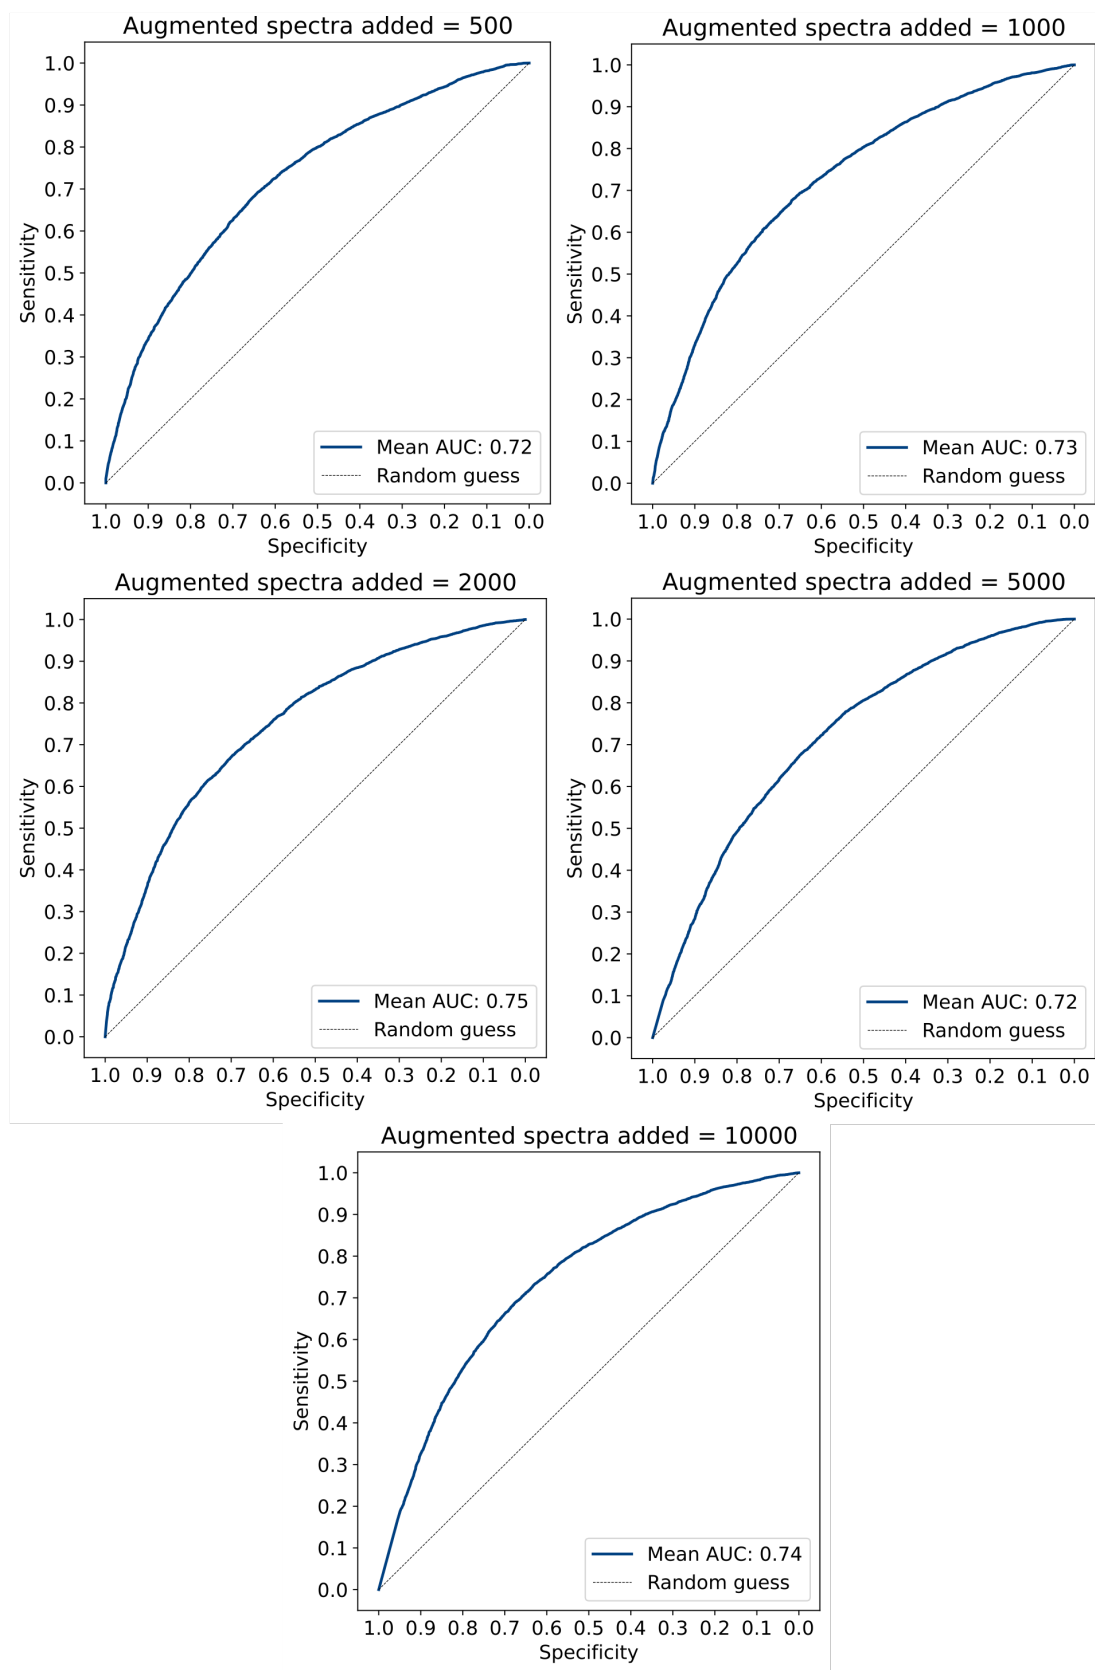

Figure S8: ROC curves for CNN models trained on augmented spectra generated by averaging spectra with the validation set containing 100-patient dataset only.

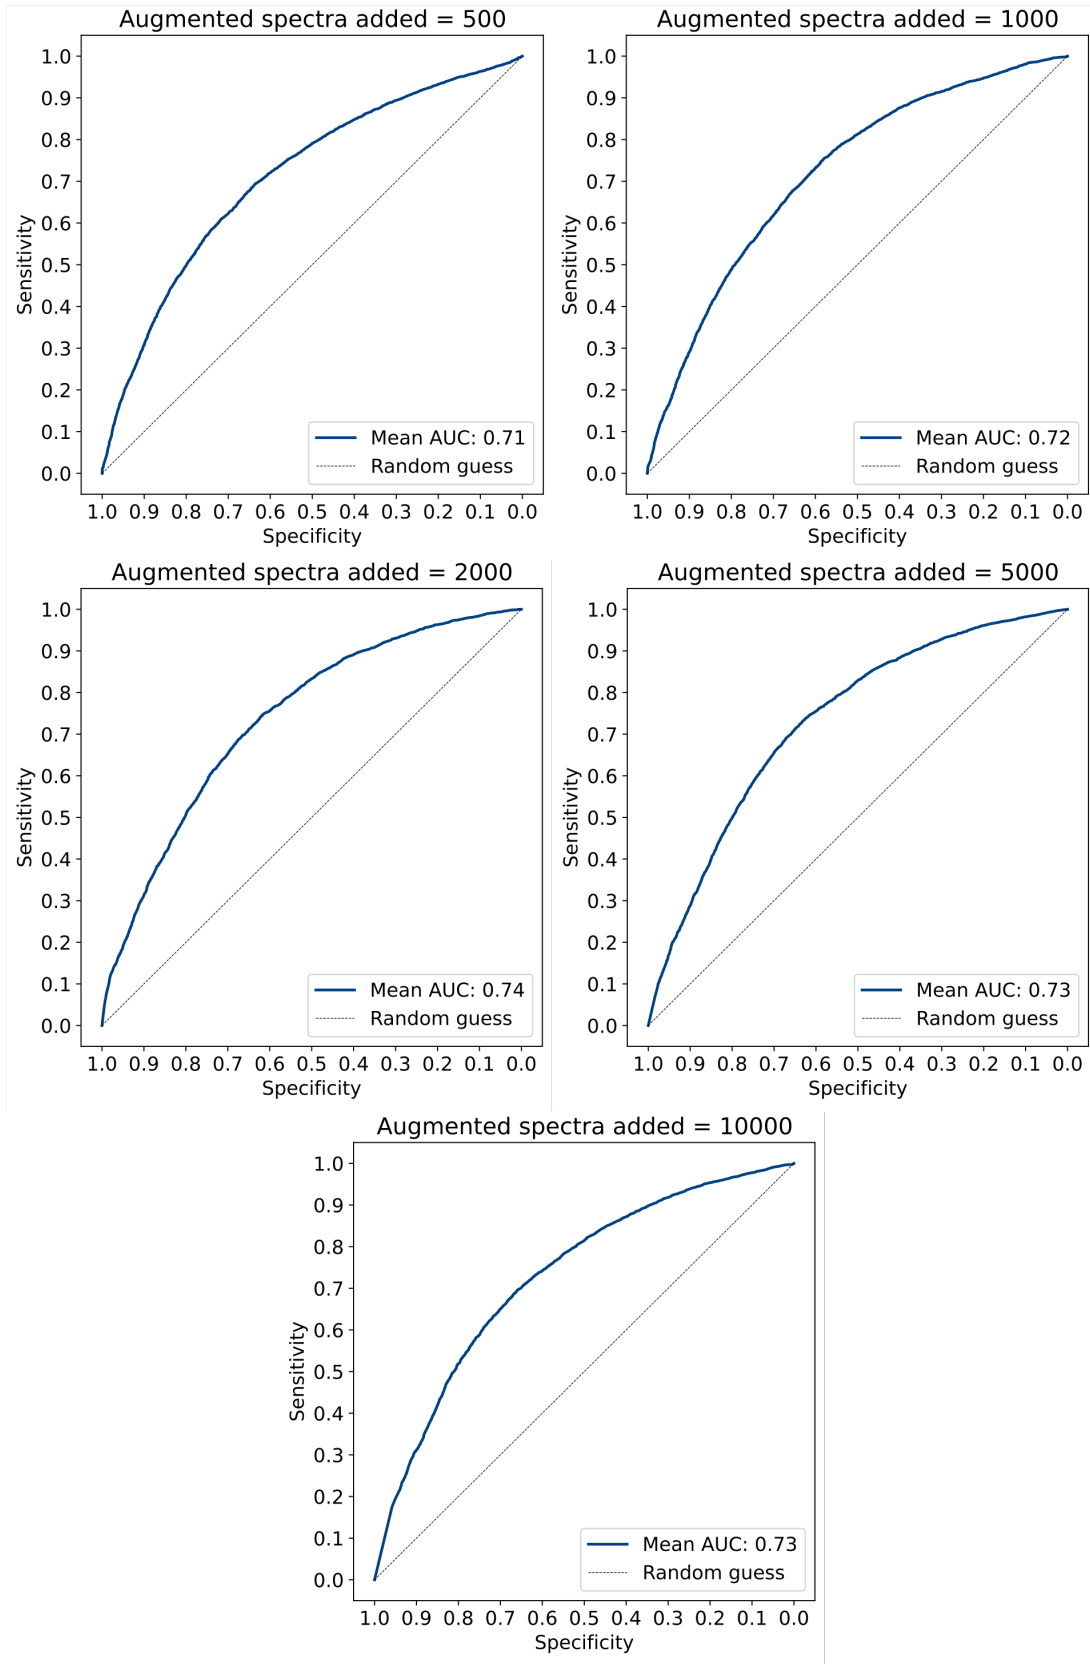

Figure S9: ROC curves for CNN models trained on augmented spectra generated by splicing spectra with the validation set containing 100-patient dataset only.



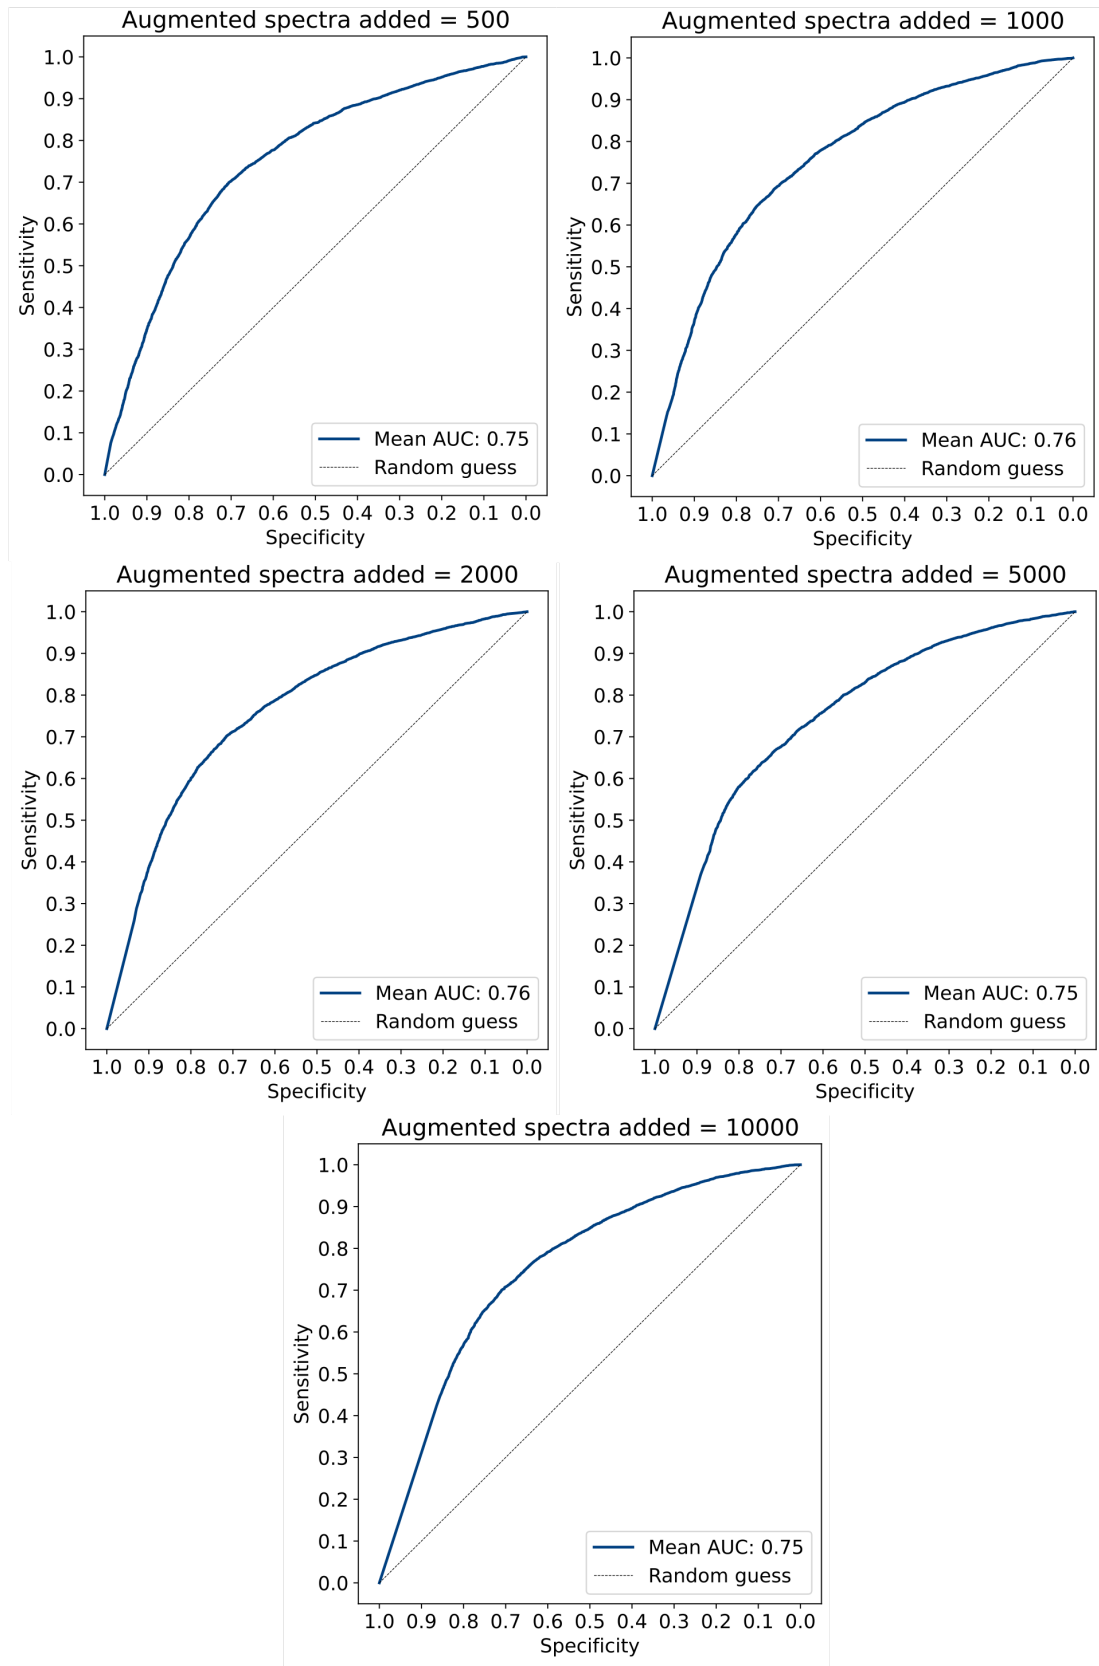

Figure S10: ROC curves for CNN models trained on WGAN augmented spectra with the validation set containing 100-patient dataset only.



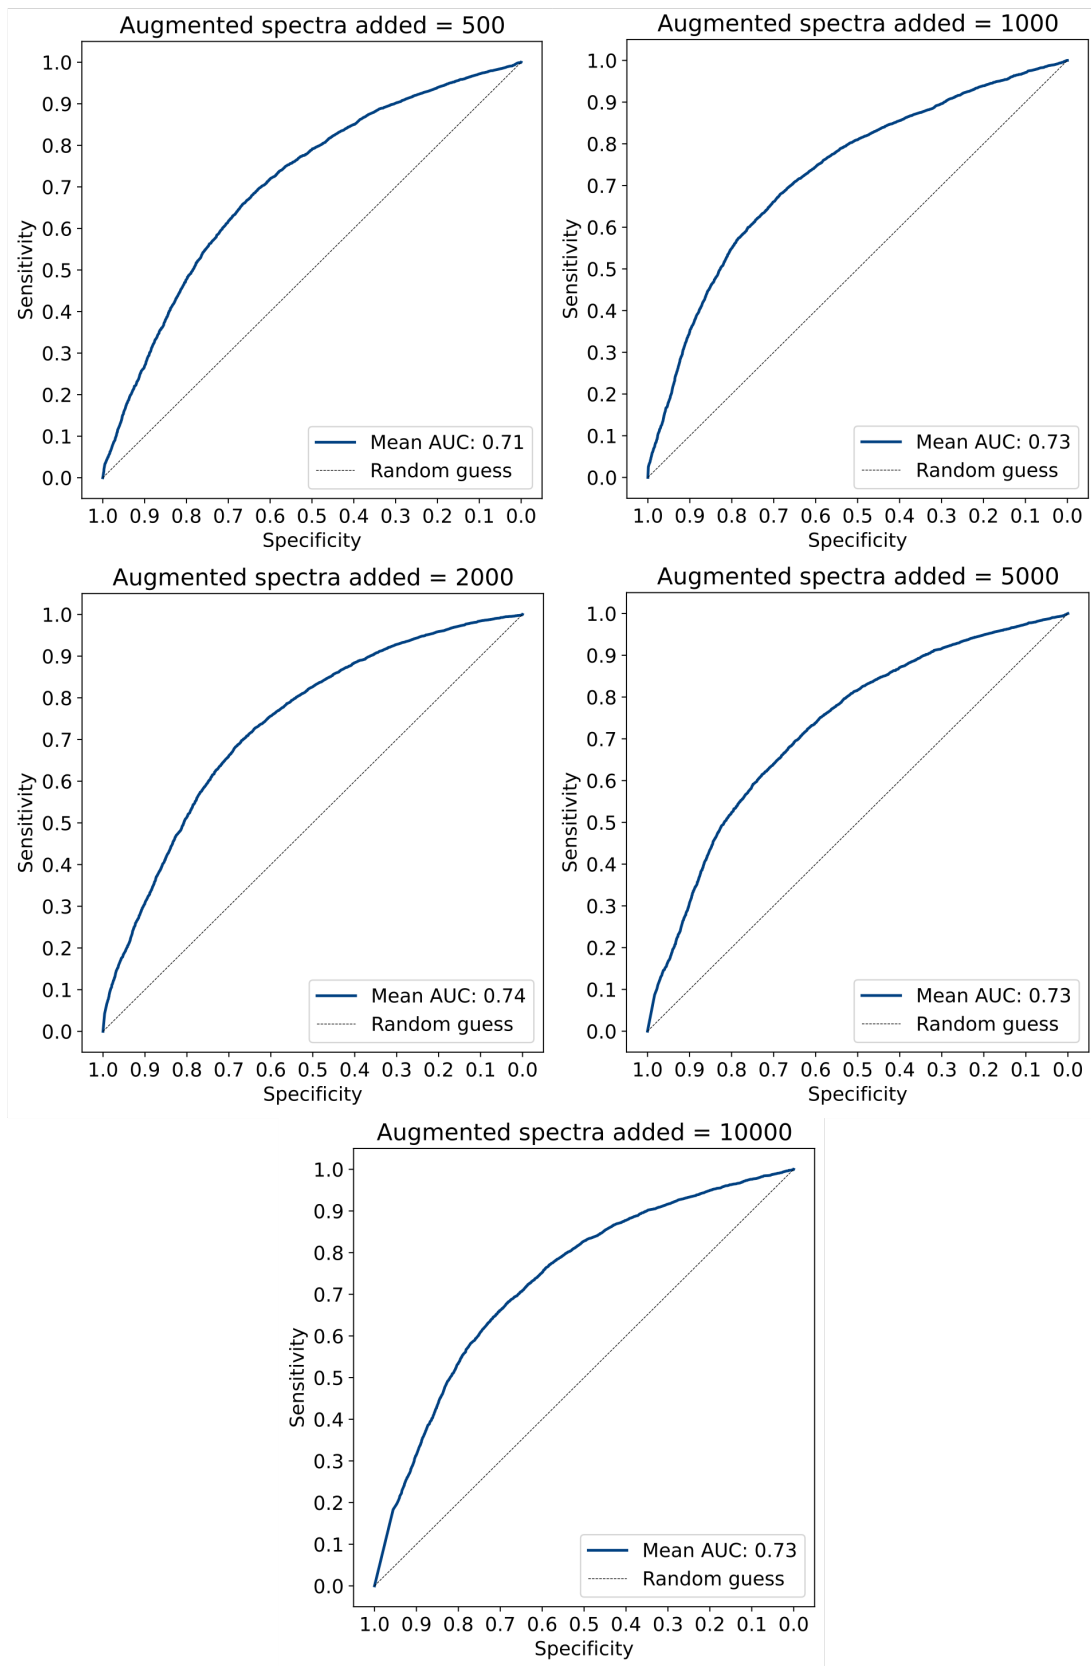

Figure S11: ROC curves for CNN models trained on augmented spectra generated by adding noise to spectra with the validation set containing full dataset.

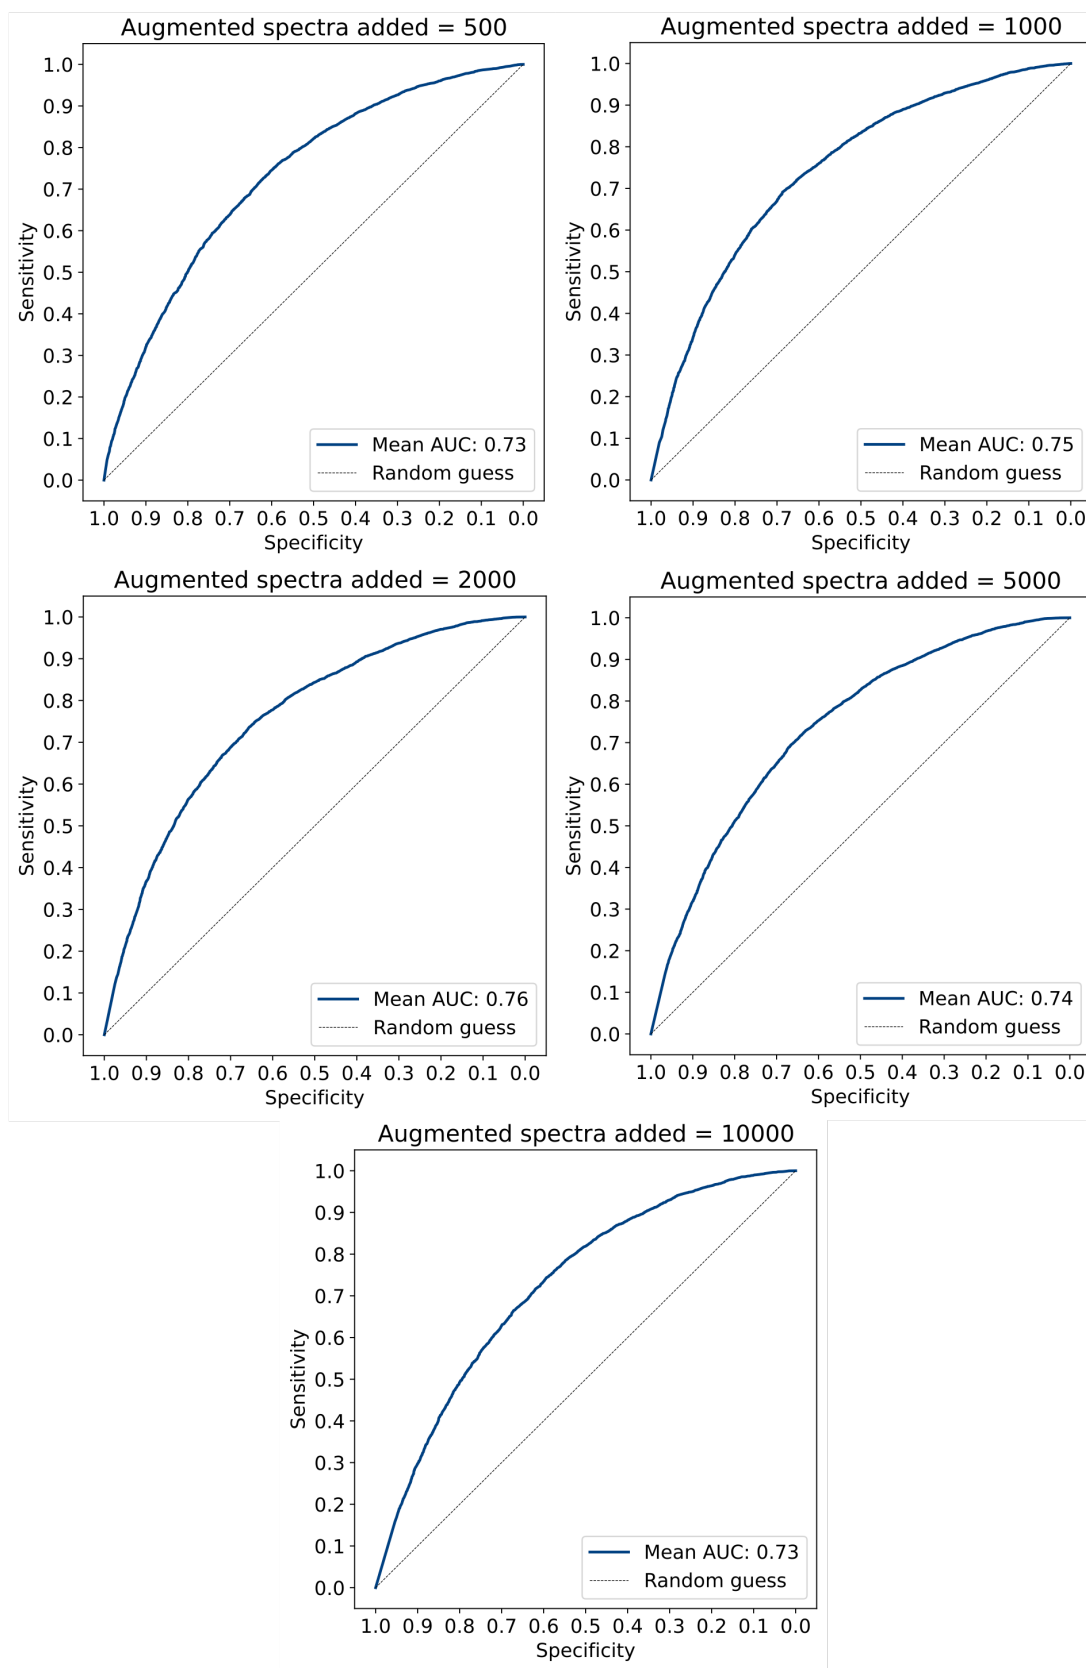

Figure S12: ROC curves for CNN models trained on augmented spectra generated by averaging spectra with the validation set containing full dataset.

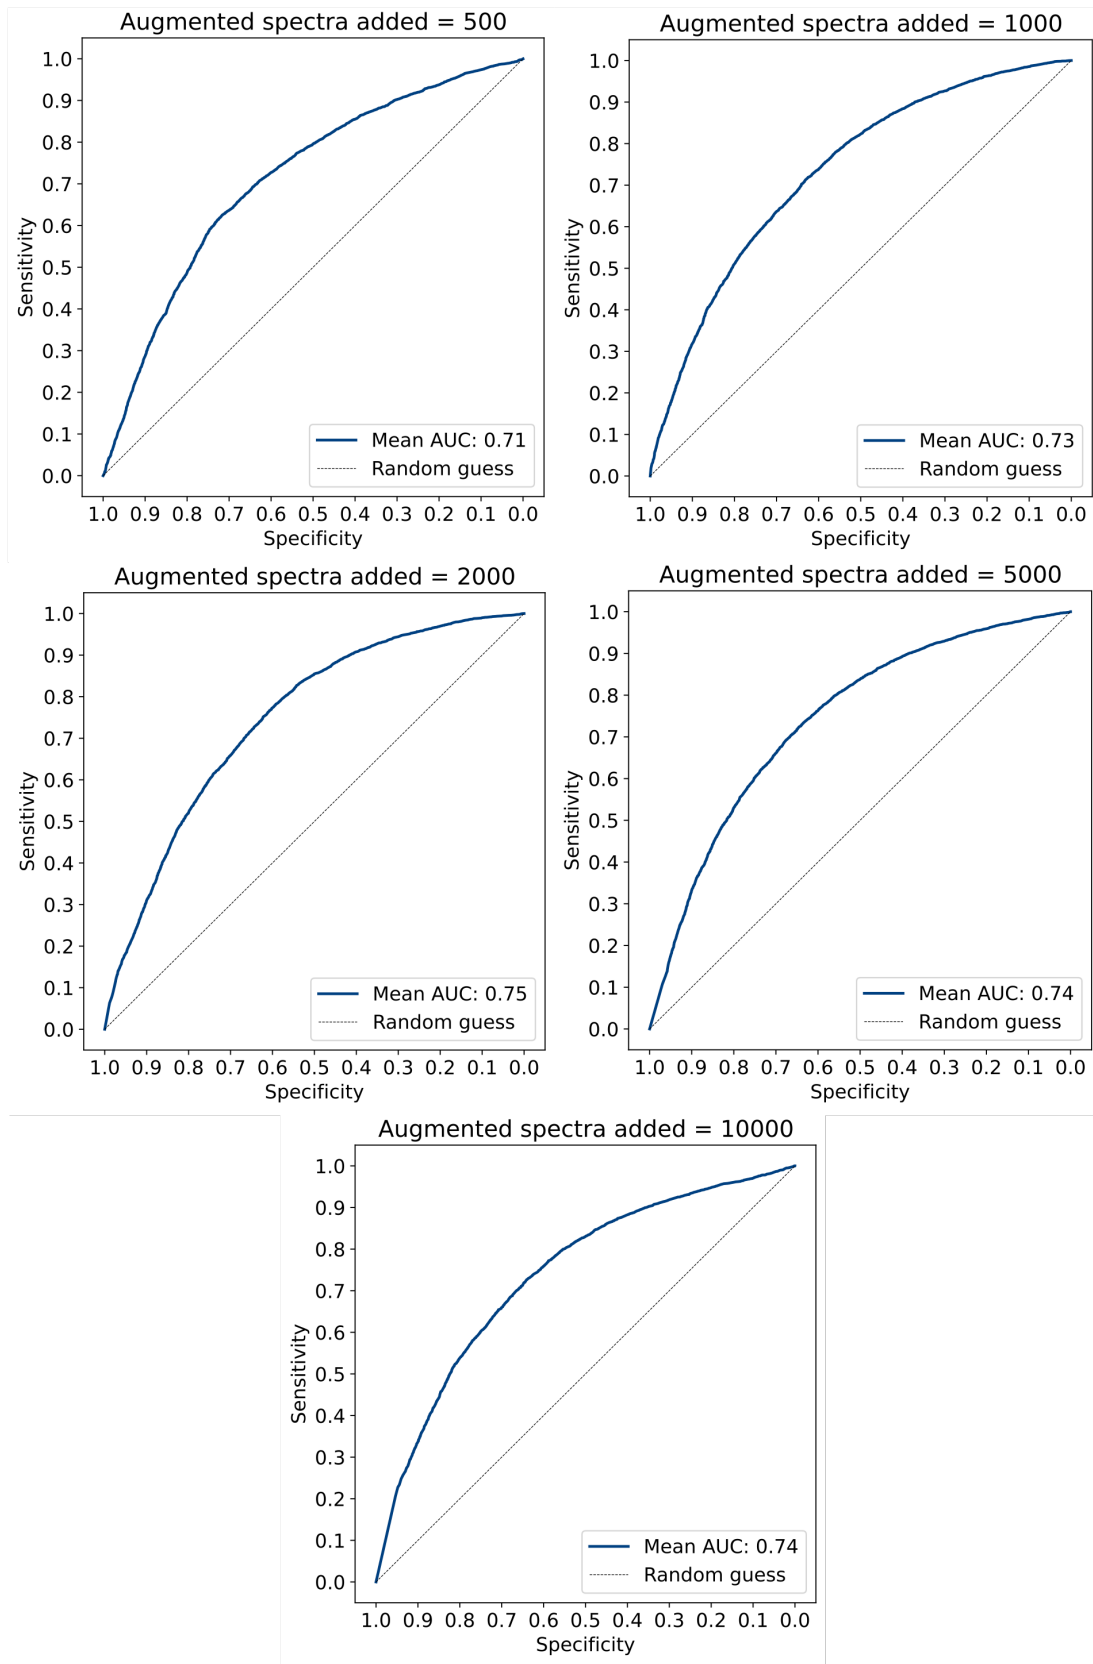

Figure S13: ROC curves for CNN models trained on augmented spectra generated by splicing spectra with the validation set containing full dataset.

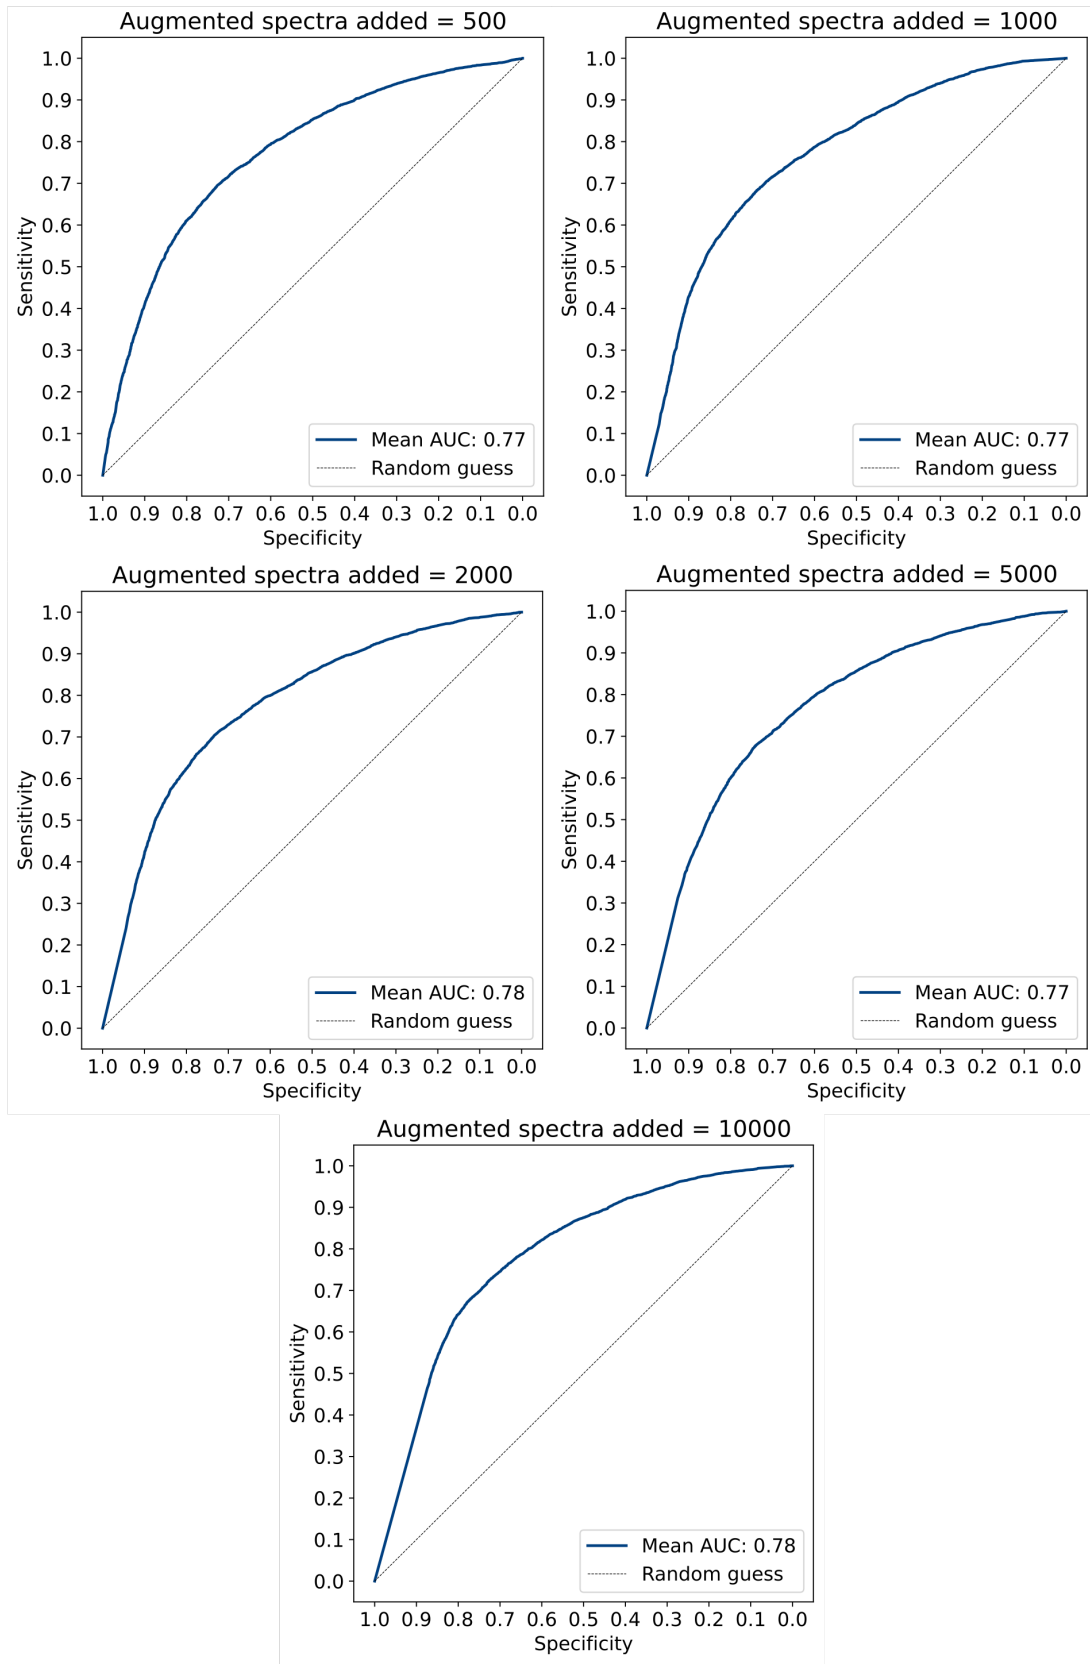

Figure S14: ROC curves for CNN models trained on WGAN augmented spectra with the validation set containing full dataset.
